# Supplementary material for: Catalytic role of borane and alane in hydrogen release from cyclic amine adducts CnH2n+1N·XH3 [X = B, Al; n = 2–5]: a theoretical interpretation
Source: Royal Society of Chemistry journal article supplement (doi:10.1039/c4ra01989j), 2014-01-01
Supplement: c4ra01989j1.pdf [file c4ra01989j1.pdf]

## Catalytic role of borane and alane in hydrogen release from cyclic amine adducts $C_nH_{2n+1}N \cdot XH_3$ [ $X=B, Al$ ; $n = 2-5$ ]: a theoretical interpretation

Kaushik Sen, Tahamida Banu, Tanay Debnath, Deepanwita Ghosh and Abhijit K. Das\*

*Department of Spectroscopy, Indian Association for the Cultivation of Science, Jadavpur, Kolkata 700032, India*

### Supporting Information

**Table S1** Calculated wt% values for hydrogen storage of the cyclic amine-borane and amine-alane compounds

|                                          | Species                                             | wt% |
|------------------------------------------|-----------------------------------------------------|-----|
| $C_nH_{2n+1}N \cdot BH_3$ ( $n = 2-5$ )  | $C_2H_5N \cdot BH_3$ ( <b>1<sub>ab</sub></b> )      | 3.5 |
|                                          | $C_3H_7N \cdot BH_3$ ( <b>2<sub>ab</sub></b> )      | 2.8 |
|                                          | $C_4H_9N \cdot BH_3$ ( <b>3<sub>ab</sub></b> )      | 2.4 |
|                                          | $C_5H_{11}N \cdot BH_3$ ( <b>4<sub>ab</sub></b> )   | 2.0 |
| $C_nH_{2n+1}N \cdot AlH_3$ ( $n = 2-5$ ) | $C_2H_5N \cdot AlH_3$ ( <b>1<sub>aal</sub></b> )    | 2.8 |
|                                          | $C_3H_7N \cdot AlH_3$ ( <b>2<sub>aal</sub></b> )    | 2.3 |
|                                          | $C_4H_9N \cdot AlH_3$ ( <b>3<sub>aal</sub></b> )    | 2.0 |
|                                          | $C_5H_{11}N \cdot AlH_3$ ( <b>4<sub>aal</sub></b> ) | 1.8 |
